# Supplementary material for: Inorganic complex intermediate Co3O4nanostructures using green ligation from natural waste resources
Source: Royal Society of Chemistry journal article supplement (doi:10.1039/c4ra07646j), 2014-09-02
Supplement: c4ra07646j1.pdf [file c4ra07646j1.pdf]

## **Inorganic complex intermediate $\text{Co}_3\text{O}_4$ nanostructures using green ligation from natural waste resources**

Rathinam Yuvakkumar,<sup>a</sup> A. Joseph Nathanael<sup>b</sup> and Sun Ig Hong<sup>a\*</sup>

### **MATERIALS AND METHODS**

#### **$\text{Co}_3\text{O}_4$ nanostructures using rambutan extract**

Rambutan fruit exported from Thailand was collected from Daejeon supermarket, South Korea. Cobalt nitrate [ $\text{Co}(\text{NO}_3)_2 \cdot 6\text{H}_2\text{O}$ ] and ethanol were purchased from Merck chemicals. Double distilled water was used throughout the experiment. Manually separated rambutan peels were washed with running water and subsequently incised into small pieces and placed in circulating oven at  $50^\circ\text{C}$  until complete dryness. Finely dried rambutan peels (3g) were boiled with ethanol and double distilled water mixture (1:2 ratio) for 10 min. The extract was filtered through Whatman No. 1 filter paper. 0.1 M  $\text{Co}(\text{NO}_3)_2 \cdot 6\text{H}_2\text{O}$  was prepared in 50 mL and 10 mL rambutan extract was slowly added drop wise into the solution under magnetic stirring at  $80^\circ\text{C}$  for 2 h and then incubated at room temperature for 1, 4 and 7 days to form cobalt-ellagate complex formation. Complex formed after adequate time of incubation was collected and  $\text{Co}_3\text{O}_4$  nanostructures were obtained due to direct decomposition of cobalt-ellagate complexes in muffle furnace at  $450^\circ\text{C}$  in static air atmosphere.

### ***MTT assay for cell proliferation***

#### ***Dulbecco's Modified Eagles Medium (DMEM) (pH 7.4)***

DMEM medium was added to 900 ml of sterile double distilled water. To this solution, 10 mM 4-(2-hydroxyethyl)-1-piperazineethanesulfonic acid (HEPES), 1 mM sodium pyruvate and 10 ml of antibiotic-antimycotic (50 U/ml penicillin, 50 µg/ml streptomycin and 2.5 µg/ml amphoterecin B) solution were added; the pH was adjusted to 7.4 using 1 N NaOH and the final volume was made up to one liter with distilled water. The medium was then filtered through 0.22 µm filter with the membrane dispensed into sterile container and stored at 4°C.

#### ***Growth medium (10% FBS)***

100 ml of growth medium was prepared by adding 10 ml FBS in 90 ml RPMI-1640 and was stored in a sterile container.

#### ***Phosphate buffered saline (PBS) (pH 7.4)***

0.63 g of sodium phosphate monobasic (NaH<sub>2</sub>PO<sub>4</sub>), 0.17 g of sodium phosphate dibasic (Na<sub>2</sub>HPO<sub>4</sub>) and 4.5 g of sodium chloride (NaCl) were dissolved in 500 ml of sterile double distilled water. The pH was adjusted to 7.4 with 0.1 N NaOH and stored in a refrigerator.

#### ***Culture medium***

Human Breast cancer cell line (3T3) were cultured in 75-cm<sup>2</sup> flask containing Dulbecco's modified Eagle's medium (DMEM; Sigma). The mediums were supplemented with 10% Fetal Bovine Serum (FBS; invitrogen), 1.5 g/L sodium bicarbonate (Gibco), 10,000 U/ml penicillin (Gibco), 10 mg/ml streptomycin (Gibco) and 25µg/ml Amphotericin B (Gibco). Cells were cultured as monolayers in culture flasks at 37°C under a humidified atmosphere of 5% CO<sub>2</sub> in air. All experiments were performed using cells from passage 20 or less. During the experiment time, the serum containing medium was replaced by serum free medium containing 20–2.5µg/ml of

the crude, which were dissolved in DMSO and the stock maintained in  $-20^{\circ}\text{C}$ . The final working concentration of DMSO was less than 1.0 %.

### ***Passaging the cells***

The cells reaching 80-90% of confluence, the cells were trypsinized and used for subculture. The medium from the culture flask was aspirated; cells were rinsed with 2 ml of PBS and aspirated quickly and 0.5 ml of trypsin-EDTA (0.5% trypsin, 5.3 mM EDTA sodium salt) solution was added and incubated at room temperature (in the laminar hood) for 30 - 60 sec. Then the trypsin-EDTA solution was aspirated quickly and the flask was incubated in  $\text{CO}_2$  incubator for 2 min and tapped gently at the bottom for complete detachment of cells from the surface of the flask. The cells were then gently re-suspended in fresh growth medium and transferred to sterile  $75\text{ cm}^2$  flasks and the volume of medium was made up to 20 ml with growth medium.

### ***Drug preparation***

The extract was dissolved in Dimethyl Sulfoxide (DMSO) to give a final concentration of DMSO not more than 5% and did not affect cell survival.

### ***Cell viability test***

The viability of cells was assessed by MTT assay (Mosmann, 1983) using Human Breast cancer cell line (3T3). Reagents used are MTT (3-[4,5-dimethylthiazol-2-yl] 2,5-diphenyl tetrazolium bromide): 0.5 mg MTT/ml of serum-free DMEM medium, solubilizing solution: dimethyl sulfoxide and phosphate buffered saline (PBS) (pH 7.4). The cells were plated separately in 96 well plates at a concentration of  $1 \times 10^5$  cells/well. After 24 h, cells were washed twice with 100  $\mu\text{l}$  of serum-free medium and starved for an hour at  $37^{\circ}\text{C}$ . After starvation, cells were treated with different concentrations of test compound (10-500  $\mu\text{g/ml}$ ) for 24 h. At the end

the treatment period, the medium was aspirated and serum free medium containing MTT (0.5 mg/ml) was added and incubated for 4 h at 37°C in a CO<sub>2</sub> incubator. The 50% inhibitory concentration value (IC<sub>50</sub>) of the crude extracts was identified in different cancer cell lines and a normal cell line. The MTT containing medium was then discarded and the cells were washed with PBS (200 µl). The crystals were then dissolved by adding 100 µl of DMSO and this was mixed properly by pipetting up and down. Spectrophotometrical absorbance of the purple blue formazan dye was measured in a microplate reader at 570 nm (Biorad 680). Cytotoxicity was determined using Graph pad prism5 software.

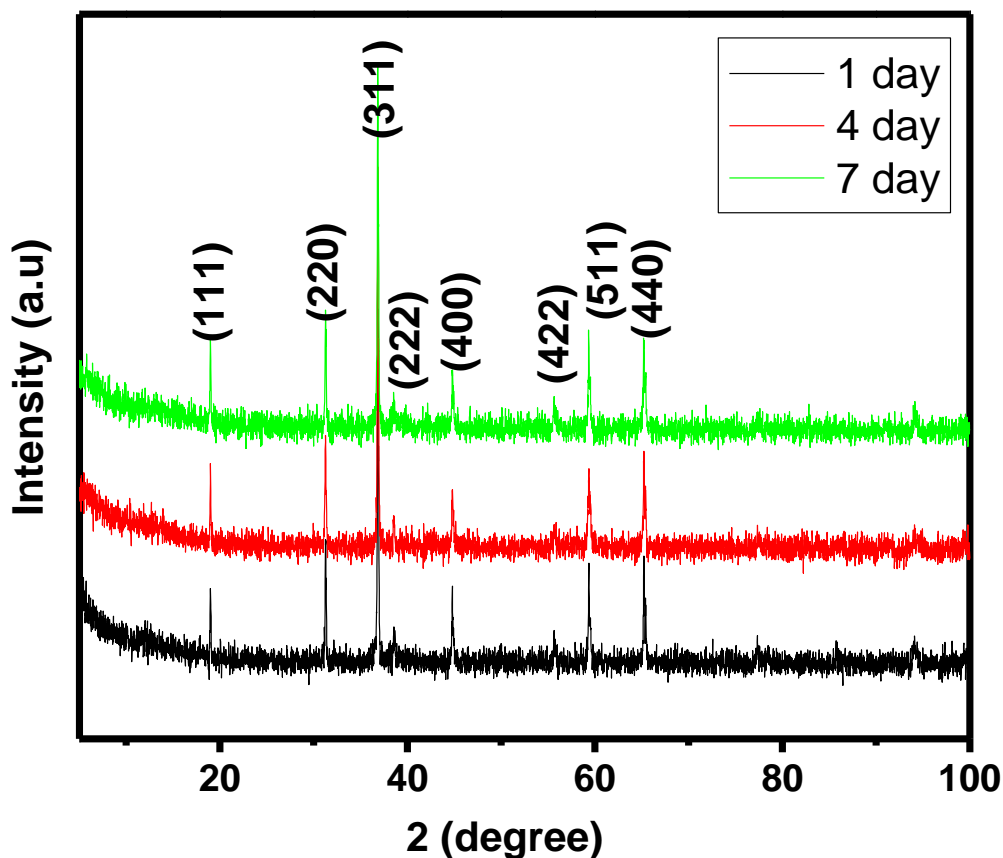

**Figure S1.** XRD pattern: (a) 1, (b) 4, (c) 7 days of reaction product from the mixture of 0.1M Co(NO<sub>3</sub>)<sub>2</sub>·6H<sub>2</sub>O and 10 ml extract

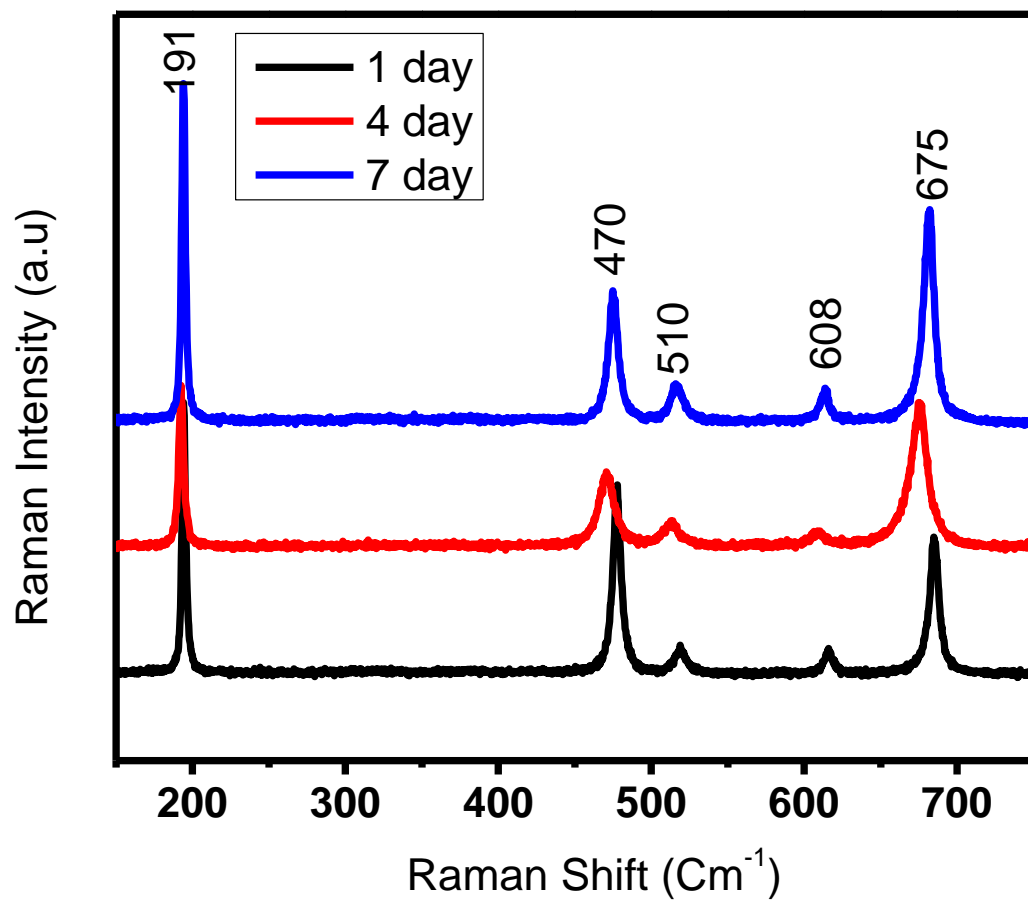

**Figure S2.** Raman pattern: Reaction product from the mixture of 0.1M  $\text{Co}(\text{NO}_3)_2 \cdot 6\text{H}_2\text{O}$  and 10 ml extract (a) 1, (b) 4, (c) 7 days

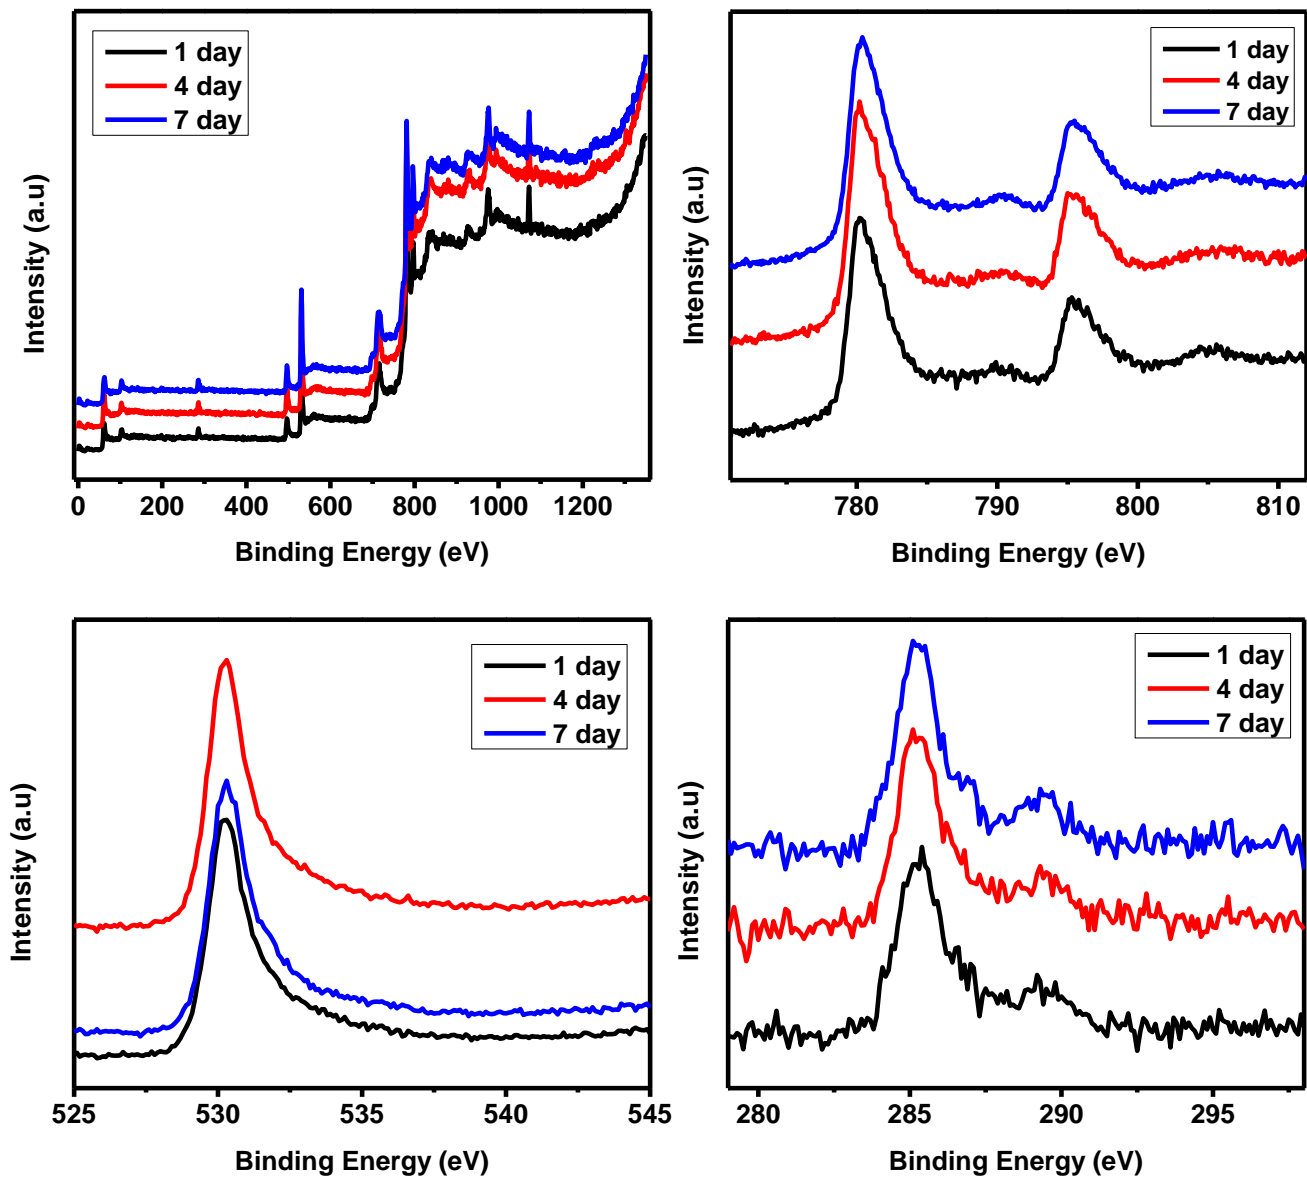

**Figure S3.** XPS pattern (Survey spectrum, Co 2p<sub>3/2</sub> and 1/2, O<sub>1s</sub> and C<sub>1s</sub> scan): (a) 1, (b) 4, (c) 7 days of reaction product from the mixture of 0.1M Co(NO<sub>3</sub>)<sub>2</sub>·6H<sub>2</sub>O and 10 ml extract
